# Supplementary material for: Chemical and Synthetic Genetic Array Analysis Identifies Genes that Suppress Xylose Utilization and Fermentation in Saccharomyces cerevisiae
Source: PubMed Central journal article supplement (PMC3276145; doi:10.1534/g3.111.000695), 2011-09-01
Supplement: supp_1.4.247_FigureS1.pdf [file supp_1.4.247_FigureS1.pdf]

A

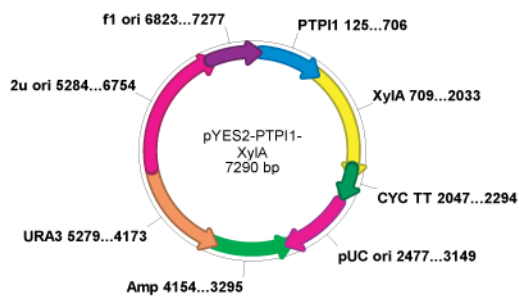

B

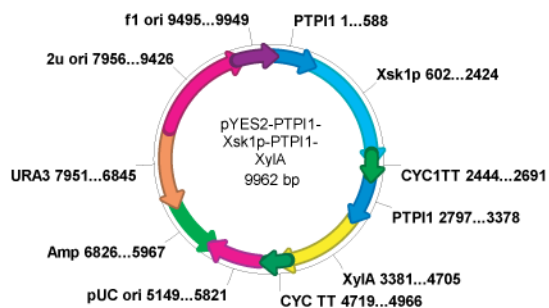

**Figure S1 (A)** Schematic map *pXYLA*. The pYES2 plasmid containing the exogenous XI gene *XYLA* from *Piromyces SpE2*. **(B)** Schematic map of *pXYLA,XKS1*. The pYES2 plasmid containing the XI gene *XYLA* and an additional copy of the endogenous XK gene *XKS1* from *S. cerevisiae*.
