# Supplementary material for: Chemical and Synthetic Genetic Array Analysis Identifies Genes that Suppress Xylose Utilization and Fermentation in Saccharomyces cerevisiae
Source: PubMed Central journal article supplement (PMC3276145; doi:10.1534/g3.111.000695), 2011-09-01
Supplement: supp_1.4.247_FigureS2.pdf [file supp_1.4.247_FigureS2.pdf]

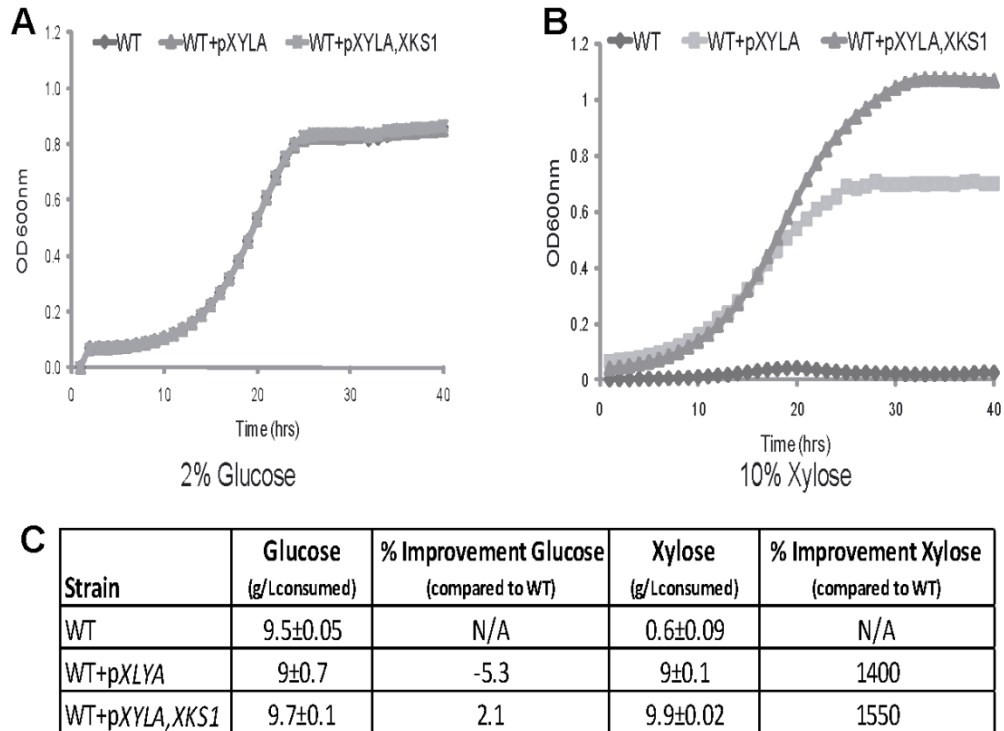

**Figure S2** The addition of pXYLA or pXYLA,XKS1 increases the xylose utilization of *S. cerevisiae*. Growth analysis of wild-type (WT, Y7092), to transformed strains, WT + pXYLA (YKB2179) and WT + pXYLA,XKS1 (YKB2178) in liquid media containing 2% glucose (A) or 10% xylose (B). Growth analysis was performed in triplicate on Multiskan Ascent plate reader (Thermo Electron Corporation), with OD<sub>600</sub> taken every 30 min over a 20-hour period at 30°. The error bars represent 1 standard deviation and are smaller than the data marker. (C) Sugar consumption table of wild-type (WT, Y7092), or wild-type transformed with pXYLA (YKB2179), or pXYLA,XKS1 (YKB2178) starting in either 13% glucose or xylose media. Fermentations were pitched with  $1.5 \times 10^7$  cells/ml and carried out at 30°. The calculation for g/L consumed of sugars corresponds to the concentrations of sugars observed at the end of the batches compared to the starting amount.
