# Supplementary material for: Chemical and Synthetic Genetic Array Analysis Identifies Genes that Suppress Xylose Utilization and Fermentation in Saccharomyces cerevisiae
Source: PubMed Central journal article supplement (PMC3276145; doi:10.1534/g3.111.000695), 2011-09-01
Supplement: supp_1.4.247_FigureS3.pdf [file supp_1.4.247_FigureS3.pdf]

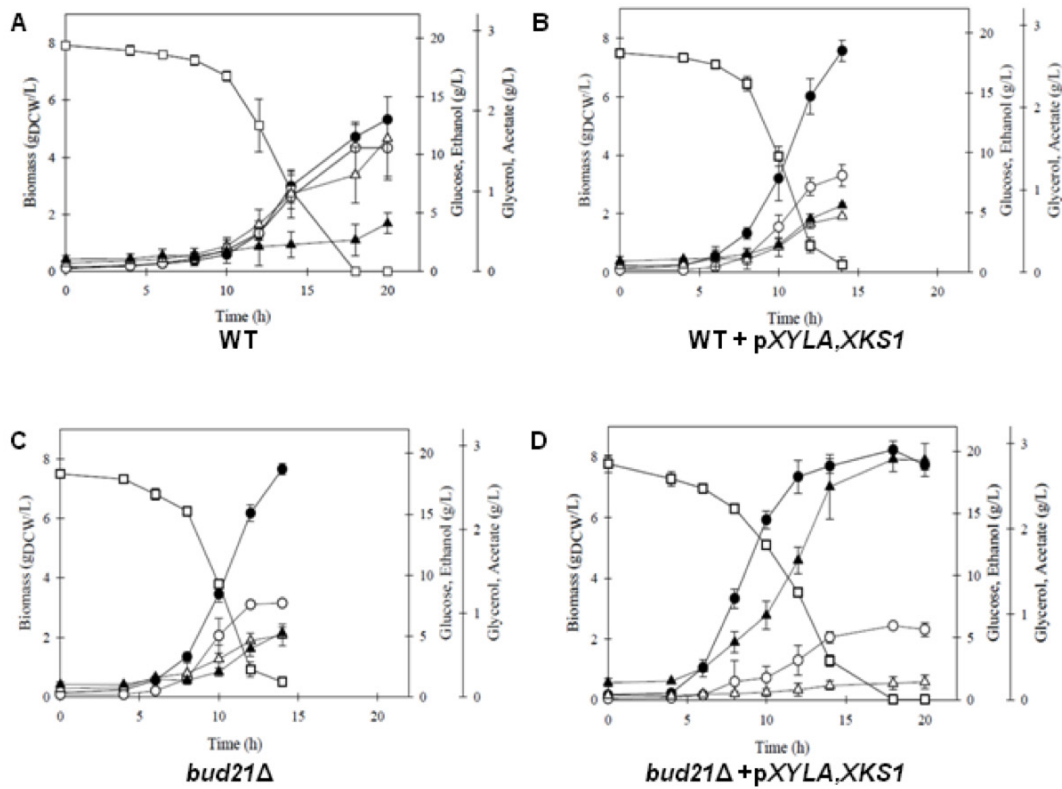

**Figure S3** Fermentation profile of the *S. cerevisiae* CEN.PK 113-13D derivative strains during aerobic batch cultivation in glucose (20g/L). **(A)** CEN.PK 113-13D wild-type (WT, YKB2684), **(B)** WT transformed with *pXYLA,XKS1* (YKB2680), **(C)** *bud21Δ* (YKB2666) and **(D)** *bud21Δ* transformed with *pXYLA,XKS1* (YKB2667). Biomass (closed circles), glucose (open squares), ethanol (open circles), glycerol (open triangles), and acetate (closed triangles). The batches were terminated when no further changes in OD was observed. Each data point represents the mean±SD from duplicated experiments.
