# Supplementary material for: Chemical and Synthetic Genetic Array Analysis Identifies Genes that Suppress Xylose Utilization and Fermentation in Saccharomyces cerevisiae
Source: PubMed Central journal article supplement (PMC3276145; doi:10.1534/g3.111.000695), 2011-09-01
Supplement: supp_1.4.247_TableS2.pdf [file supp_1.4.247_TableS2.pdf]

**Table S2 Double mutants do not display additive improvement in xylose utilization.**

| Strain                | Glucose (g/L consumed) | Improvement Glucose (compared to WT) | Xylose (g/L consumed) | Improvement Xylose (compared to WT) |
|-----------------------|------------------------|--------------------------------------|-----------------------|-------------------------------------|
| WT                    | 8±0.05                 | N/A                                  | 0.5±0.04              | N/A                                 |
| <i>alp1Δ isc1Δ</i>    | 7.1±0.015              | -11.25                               | 6.5±0.05              | 1200                                |
| <i>alp1Δ rpl20bΔ</i>  | 7.2±0.02               | -10                                  | 6.7±0.08              | 1240                                |
| <i>isc1Δ rpl20bΔ</i>  | 7±0.06                 | -12.5                                | 6.6±0.074             | 1216                                |
| <i>bud21Δ alp1Δ</i>   | 8.1±0.09               | 1.25                                 | 6.2±0.06              | 1140                                |
| <i>bud21Δ isc1Δ</i>   | 8.4±0.08               | 5                                    | 7.15±0.15             | 1330                                |
| <i>bud21Δ rpl20bΔ</i> | 8.3±0.1                | 3.75                                 | 6.5±0.06              | 1200                                |

  

| Strain                            | Glucose (g/L consumed) | Improvement Glucose (compared to WT +pXYLA,XKS1) | Xylose (g/L consumed) | Improvement Xylose (compared to WT +pXYLA,XKS1) |
|-----------------------------------|------------------------|--------------------------------------------------|-----------------------|-------------------------------------------------|
| WT +pXYLA,XKS1                    | 8.1±0.02               | N/A                                              | 5.8±0.09              | N/A                                             |
| <i>alp1Δ isc1Δ</i> +pXYLA,XKS1    | 8.6±0.08               | 6.2                                              | 7.2±0.02              | 24.1                                            |
| <i>alp1Δ rpl20bΔ</i> +pXYLA,XKS1  | 8.2±0.074              | 1.23                                             | 7±0.03                | 20.7                                            |
| <i>isc1Δ rpl20bΔ</i> +pXYLA,XKS1  | 8.3±0.08               | 2.5                                              | 6.2±0.02              | 6.9                                             |
| <i>bud21Δ alp1Δ</i> +pXYLA,XKS1   | 8.0±0.08               | -1.23                                            | 7.2±0.03              | 24.16                                           |
| <i>bud21Δ isc1Δ</i> +pXYLA,XKS1   | 8.4±0.09               | 3.7                                              | 7.4±0.04              | 27.6                                            |
| <i>bud21Δ rpl20bΔ</i> +pXYLA,XKS1 | 8.2±0.1                | 1.23                                             | 6.8±0.1               | 17.26                                           |

**Analysis of the consumption of glucose and xylose of the double mutants of the suppressors.** Strains tested were Wild-type (YKB731), *alp1Δ isc1Δ* (YKB2534), *alp1Δ rpl20bΔ* (YKB2535), *isc1Δ rpl20bΔ* (YKB2536), *bud21Δ alp1Δ* (YKB2537), *bud21Δ isc1Δ* (YKB2538), *bud21Δ rpl20bΔ* (YKB2539) without (top table) and with *pXYLA,XKS1* (bottom table). Growth cultures were started in either 13% glucose or xylose media, pitched with  $1.5 \times 10^7$  cells/ml and carried out at 30° with for 168 hours. The calculation for g/L consumed of sugars corresponds to the concentrations of sugars observed at the end of the batches compared to the starting amount.
